# Supplementary material for: Dapagliflozin reduces thrombin generation and platelet activation: implications for cardiovascular risk reduction in type 2 diabetes mellitus
Source: PubMed Central journal article supplement (PMC8245397; doi:10.1007/s00125-021-05498-0), 2021-06-16
Supplement: 125_2021_5498_MOESM1_ESM.pdf [file 125_2021_5498_MOESM1_ESM.pdf]

|                                             | <b>Control</b> | <b>Dapagliflozin</b> | <b><i>P value</i></b> |
|---------------------------------------------|----------------|----------------------|-----------------------|
| Body weight (x10 <sup>-3</sup> kg)          | 49.9 ± 5.8     | 50.4 ± 6.4           | 0.839                 |
| Total body fat mass (fat mass / total mass) | 0.36 ± 0.007   | 0.37 ± 0.014         | 0.607                 |
| BMI (x10 <sup>-2</sup> g/mm <sup>2</sup> )  | 0.53 ± 0.03    | 0.53 ± 0.04          | 0.852                 |
| Heart rate (bpm)                            | 657 ± 21       | 666 ± 33             | 0.588                 |
| Systolic blood pressure (mmHg)              | 117 ± 6        | 116 ± 9              | 0.898                 |
| Diastolic blood pressure (mmHg)             | 58 ± 9         | 51 ± 9               | 0.279                 |
| Fasting blood glucose / 0 minutes (mmol/l)  | 15.1 ± 1.4     | 15.3 ± 1.3           | 0.808                 |
| Fasting blood glucose / 5 minutes (mmol/l)  | 21.9 ± 1.0     | 21.9 ± 1.6           | 0.953                 |
| Fasting blood glucose / 15 minutes (mmol/l) | 27.7 ± 2.4     | 24.7 ± 1.9           | 0.040                 |
| Blood glucose, oGTT 30 minutes (mmol/l)     | 22.2 ± 3.4     | 20.7 ± 3.5           | 0.455                 |
| Blood glucose, oGTT 60 minutes (mmol/l)     | 18.0 ± 3.3     | 14.9 ± 1.3           | 0.056                 |
| Blood glucose, oGTT 90 minutes (mmol/l)     | 16.3 ± 1.4     | 14.7 ± 1.0           | 0.040                 |
| AUC (mmo/l * min)                           | 2367 ± 215     | 2118 ± 210           | 0.147                 |
| Insulin (pmol/l)                            | 1663 ± 171     | 1274 ± 238           | 0.038                 |

**ESM Table 1. Vital parameter of mice after 25 weeks of treatment**

oGTT: oral glucose tolerance test

|                                               | <b>Control</b> | <b>Dapagliflozin</b> | <b><i>p</i> - value</b> |
|-----------------------------------------------|----------------|----------------------|-------------------------|
| Platelets (10 <sup>3</sup> /mm <sup>3</sup> ) | 952 ± 258      | 971 ± 276            | 0.895                   |
| Hematocrit (%)                                | 53 ± 5.4       | 54 ± 5.9             | 0.756                   |
| Mean platelet volume (MPV) 8 weeks            | 5.2 ± 0.1      | 5.3 ± 0.1            | 0.713                   |
| Mean platelet volume (MPV) 25 weeks           | 5.2 ± 0.2      | 5.2 ± 0.3            | 0.143                   |
| CD62P expression (% of platelets)             | 3.8 ± 1.2      | 2.8 ± 1.1            | 0.005                   |
| ETP AUC (nM*min)                              | 486 ± 46       | 485 ± 50             | 0.802                   |
| Thrombin peak height (nM)                     | 86.5 ± 7.3     | 87.4 ± 7.7           | 0.232                   |

**ESM Table 2. Murine platelet characteristics and thrombin generation**

| <b>Gene</b>   | <b>Forward primer (5'-3')</b> | <b>Reverse primer (5'-3')</b> |
|---------------|-------------------------------|-------------------------------|
| <i>Abca1</i>  | <i>CTACCAACCTGCCCCGTTCTA</i>  | <i>ATGCCGATGAAGAGGTTCAC</i>   |
| <i>Apoa1</i>  | <i>TATGTGGATGCGGTCAAAGA</i>   | <i>CTGCAGCTGACTAACGGTTG</i>   |
| <i>Apoa2</i>  | <i>GACGGACCGGATATGCAGAG</i>   | <i>AGCTGCTCGTGTGTCTTCTC</i>   |
| <i>Icam1</i>  | <i>TTCTCATGCCGCACAGAACT</i>   | <i>TCCTGGCCTCGGAGACATTA</i>   |
| <i>Lcat</i>   | <i>CTTACCATCTGGCTGGATT</i>    | <i>GCCCAGAGCTGTGGTTGTAG</i>   |
| <i>18S</i>    | <i>GCAATTATTCCCCATGAACG</i>   | <i>GGCCTCACTAAACCATCCAA</i>   |
| <i>Lpl</i>    | <i>TCGTCATCGAGAGGATCCGA</i>   | <i>ACACTGCTGAGTCCTTTCCC</i>   |
| <i>Scarb1</i> | <i>CACCCTTCATGACACCCGAA</i>   | <i>TGGCAAACAGAGTATCGGGG</i>   |
| <i>Sele</i>   | <i>CGAGACGCCATCATGCAAAG</i>   | <i>CCTGCAACGTGAAACTCTGC</i>   |
| <i>Vcam1</i>  | <i>GTCACGGTCAAGTGTGTTGGC</i>  | <i>TGTTTCATGAGCTGGTCACCC</i>  |

**ESM Table 3. Primer sequences**

*Abca1*: ATP-binding cassette transporter A1; *Apoa1*: Apolipoprotein A1; *Apoa2*: Apolipoprotein A2; *Icam1*: Intercellular adhesion molecule 1; *Lcat*: Lecithin cholesterol acyltransferase; *18S*:18S ribosomal RNA; *Lpl*: lipoprotein lipase; *Scarb1*: Scavenger Receptor Class B Member 1; *Sele*: selectin E; *Vcam1*: Vascular cell adhesion protein 1.

|                                                | <b>Control</b> | <b>Dapagliflozin</b> | <b><i>p</i> - value</b> |
|------------------------------------------------|----------------|----------------------|-------------------------|
| Biglycan (x10 <sup>3</sup> um <sup>2</sup> )   | 23.5 ± 11.0    | 10.3 ± 10.8          | 0.017                   |
| aSMA (x10 <sup>3</sup> um <sup>2</sup> )       | 7.7 ± 3.4      | 2.7 ± 2.9            | 0.003                   |
| Hyaluronan (x10 <sup>3</sup> um <sup>2</sup> ) | 43.0 ± 15.8    | 20.2 ± 17.2          | 0.008                   |

**ESM Table 4. Plaque composition at the aortic root after 25 weeks of treatment with dapagliflozin**

aSMA: alpha-smooth muscle actin

|                                                 | <b>Control</b> | <b>Dapagliflozin</b> | <b><i>p</i> - value</b> |
|-------------------------------------------------|----------------|----------------------|-------------------------|
| Leucocytes (x10 <sup>3</sup> cells/ul blood)    | 4.5 ± 2.5      | 3.6 ± 1.5            | 0.287                   |
| Lymphocytes (x10 <sup>3</sup> cells/ul blood)   | 3.0 ± 1.8      | 2.3 ± 0.8            | 0.253                   |
| Neutrophils (x10 <sup>3</sup> cells/ul blood)   | 0.3 ± 0.3      | 0.2 ± 0.1            | 0.299                   |
| Monocytes (x10 <sup>3</sup> cells/ul blood)     | 0.3 ± 0.3      | 0.3 ± 0.1            | 0.447                   |
| Ly6C <sup>high</sup> monocytes (cells/ul blood) | 112 ± 131      | 77 ± 52              | 0.382                   |
| Ly6C <sup>low</sup> monocytes (cells/ul blood)  | 138 ± 92       | 126 ± 69             | 0.715                   |

**ESM Table 5. Murine blood cell count after 8 weeks of treatment with dapagliflozin**

|                                                 | <b>Control</b> | <b>Dapagliflozin</b> | <b><i>p</i> - value</b> |
|-------------------------------------------------|----------------|----------------------|-------------------------|
| Leucocytes (x10 <sup>3</sup> cells/ul blood)    | 5.3 ± 2.8      | 6.2 ± 4.9            | 0.563                   |
| Lymphocytes (x10 <sup>3</sup> cells/ul blood)   | 4.1 ± 1.8      | 5.1 ± 2.7            | 0.402                   |
| Neutrophils (x10 <sup>3</sup> cells/ul blood)   | 0.8 ± 0.8      | 0.6 ± 0.5            | 0.596                   |
| Monocytes (x10 <sup>3</sup> cells/ul blood)     | 1.0 ± 1.2      | 1.0 ± 1.1            | 0.937                   |
| Ly6C <sup>high</sup> monocytes (cells/ul blood) | 41 ± 46        | 49 ± 47              | 0.719                   |
| Ly6C <sup>low</sup> monocytes (cells/ul blood)  | 33 ± 38        | 46 ± 41              | 0.482                   |

**ESM Table 6. Murine blood cell count after 25 weeks of treatment with dapagliflozin**

|                     | <b>Sex</b><br>(m = male, f = female) | <b>Age</b><br>(years) | <b>Mean age</b><br>(male versus female =<br>n.s.) |
|---------------------|--------------------------------------|-----------------------|---------------------------------------------------|
| Healthy volunteer 1 | m                                    | 42                    | <b>34 ± 9</b>                                     |
| Healthy volunteer 2 | m                                    | 51                    |                                                   |
| Healthy volunteer 3 | m                                    | 29                    |                                                   |
| Healthy volunteer 4 | m                                    | 28                    |                                                   |
| Healthy volunteer 5 | f                                    | 28                    | <b>38 ± 11</b>                                    |
| Healthy volunteer 6 | f                                    | 29                    |                                                   |
| Healthy volunteer 7 | f                                    | 39                    |                                                   |
| Healthy volunteer 8 | f                                    | 27                    |                                                   |

**ESM Table 7. Demographic characteristics of healthy volunteers**

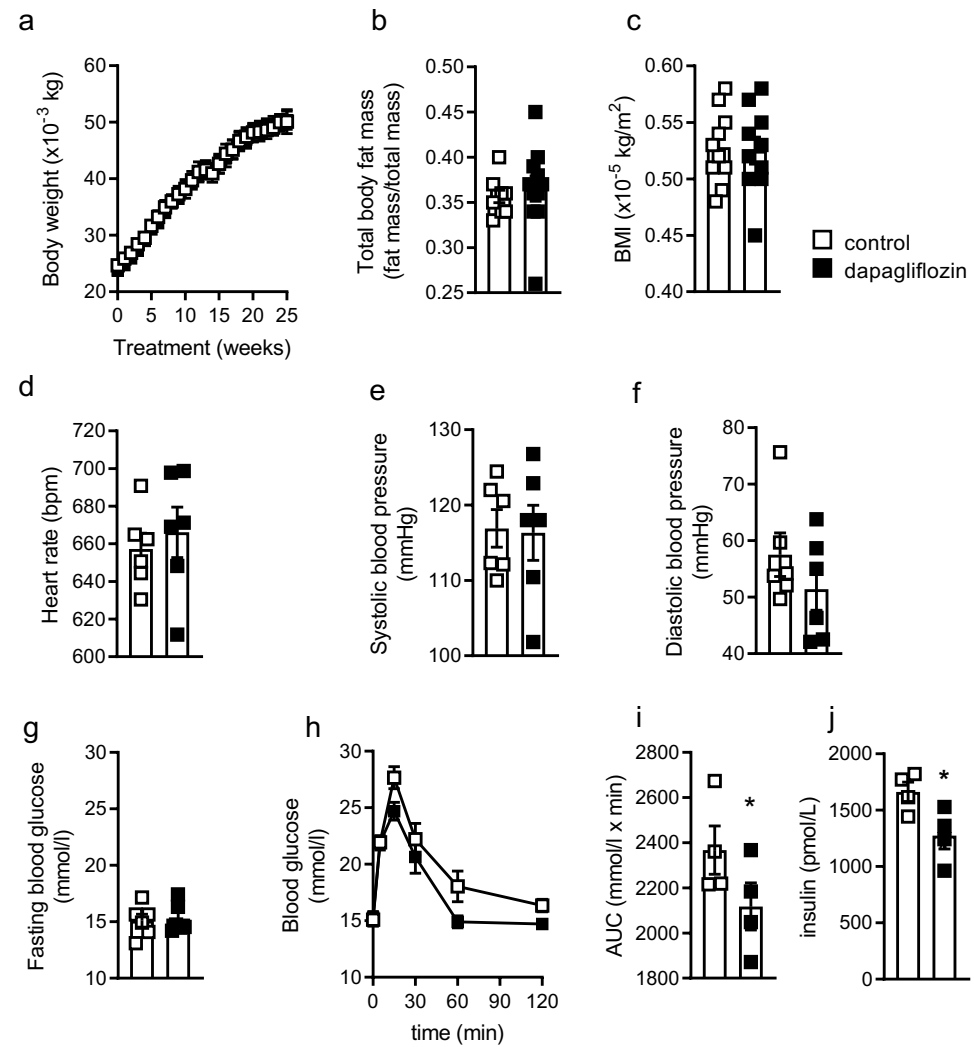

**ESM Fig. 1. Feeding with dapagliflozin improves glucose tolerance but has no effect on body weight, blood pressure or heart rate.** Male, 8-week-old *Ldlr*<sup>-/-</sup> mice received diabetogenic diet (DD) supplemented either without (control) or with dapagliflozin (25 mg/kg DD) for 25 weeks. (a) Body weight gain during treatment period; n=10-15, (b) quantification of percentual fat mass related to total body mass; n=10, and (c) body-mass-index (BMI); n=10. (d) Heart rate, (e) systolic and (f) diastolic blood pressure; n=6. (g) Fasting blood glucose, (h) curves of oral glucose tolerance test and (i) the respective area under the curve (AUC) after 8 weeks of treatment; n=9-10; and (j) plasma insulin concentration; n=4. Data are presented as mean ± SEM; (a+e) Two-way ANOVA, (b-g and i-j) Two-tailed unpaired t-test; \**P*<0.05 versus control.



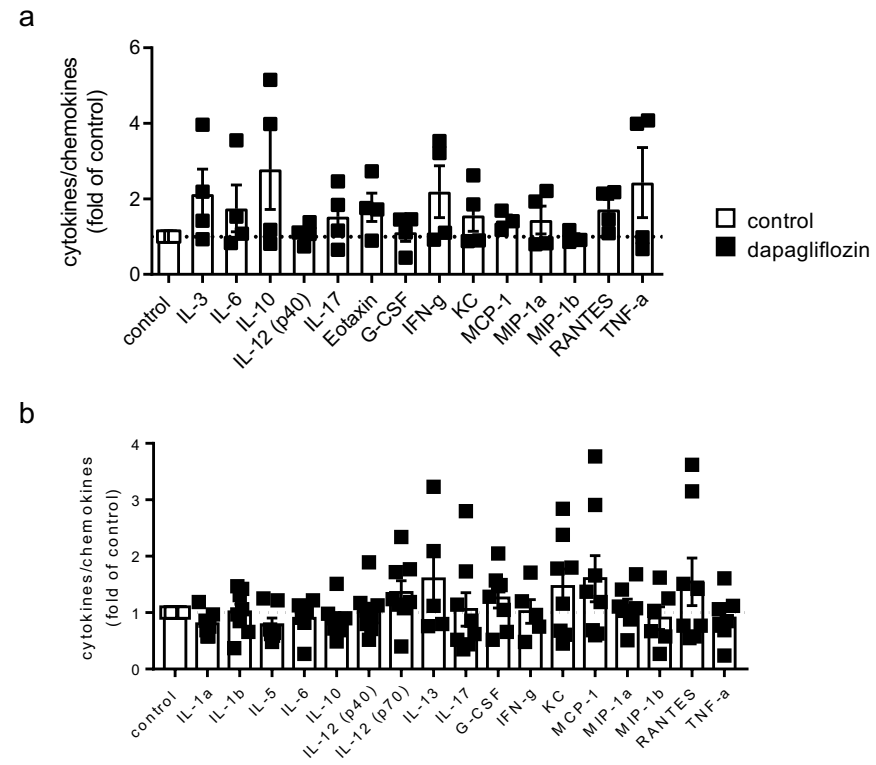

**ESM Fig. 2. Chemokine and cytokine secretion is not altered by dapagliflozin treatment.** Male, 8-week-old *Ldlr*<sup>-/-</sup> mice received diabetogenic diet (DD) supplemented either without (control) or with dapagliflozin (25 mg/kg DD). Plasmatic cytokine and chemokine profile after (a) 8 weeks; n=4, or (b), 25 weeks; n=5-8. Data are presented as mean  $\pm$  SEM, One-way ANOVA.

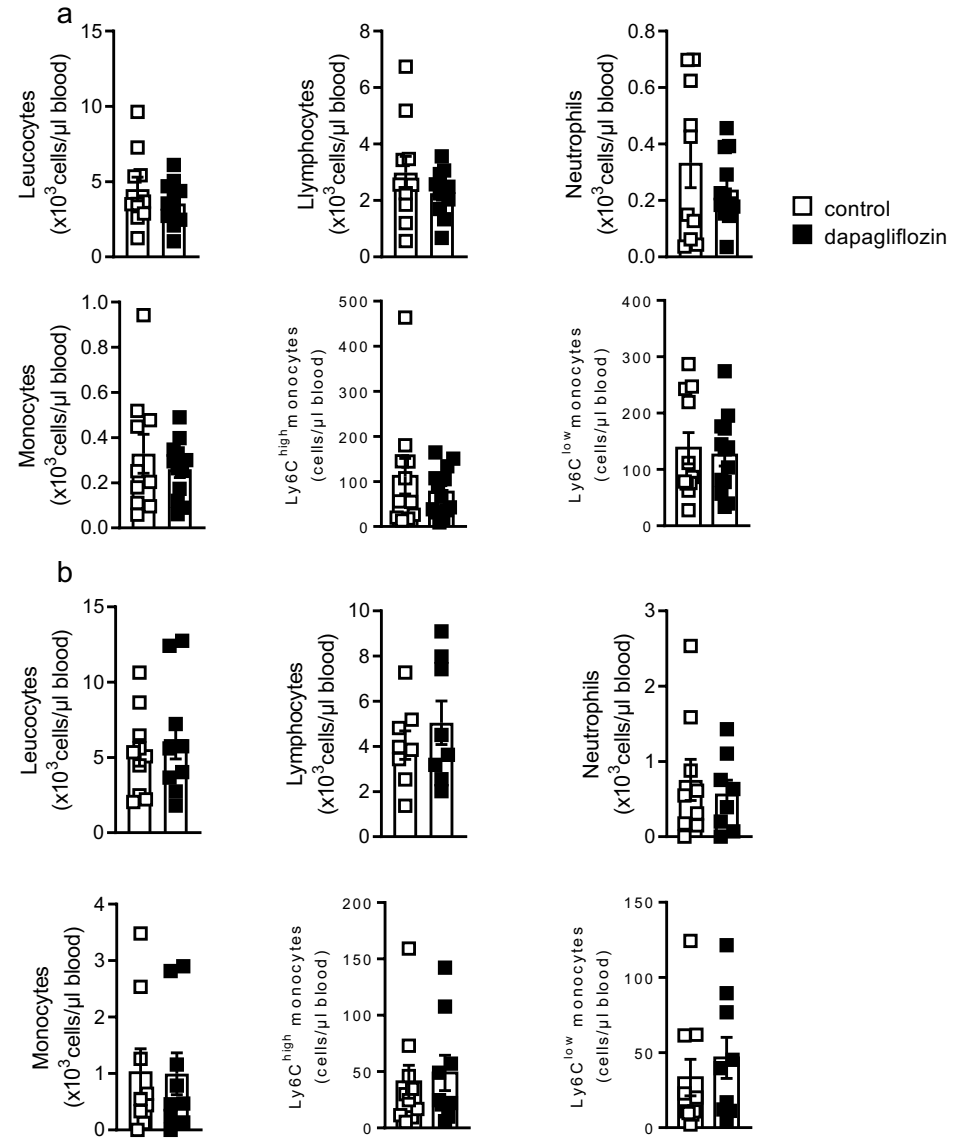

**ESM Fig. 3. No effects of dapagliflozin on circulating immune cells.** Flow cytometric analysis of leukocytes [CD45<sup>+</sup>], lymphocytes [CD45<sup>+</sup>CD3<sup>+</sup>/CD45<sup>+</sup>CD19<sup>+</sup>], neutrophils [CD11b<sup>+</sup>Ly6G<sup>+</sup>] and monocytes [CD11b<sup>+</sup>CD115<sup>+</sup>] including Ly6C<sup>low</sup> and Ly6C<sup>high</sup> subsets after (a) 8 or (b) 25 weeks of treatment with diabetogenic diet (DD) alone (control) or DD supplemented dapagliflozin (25 mg/kg DD); n=9-13. Data are presented as mean ± SEM, Two-tailed unpaired t-test.

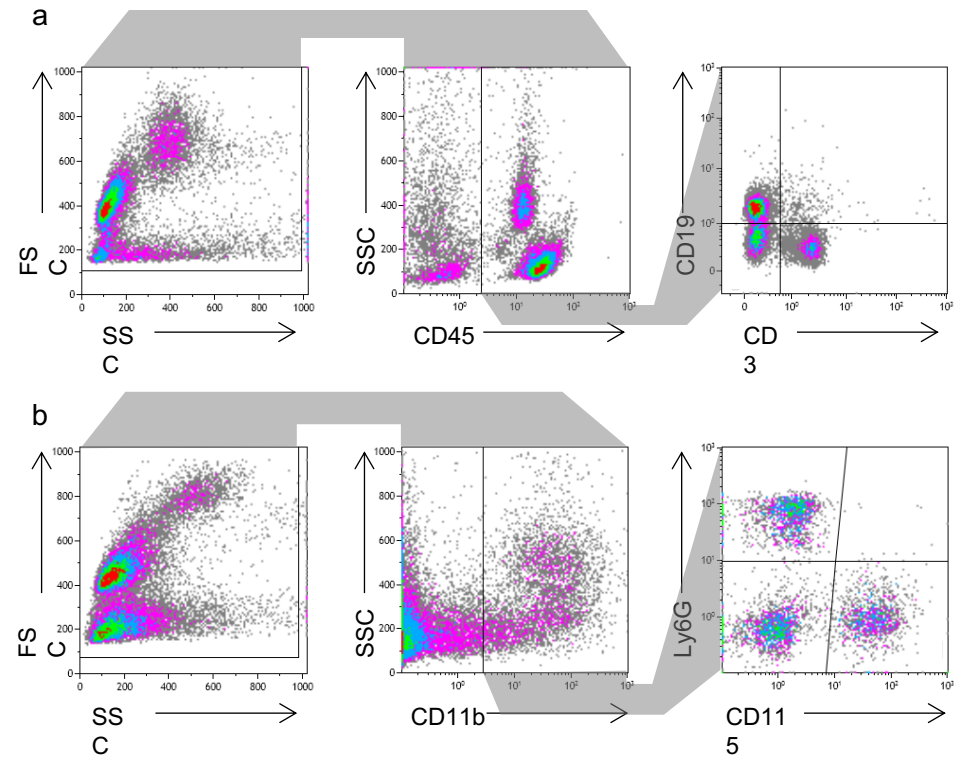

**ESM Fig. 4. Gating scheme of circulating immune cells.** (a) Representative flow cytometric dot plots and gating strategy for leukocytes [CD45<sup>+</sup>] and lymphocytes (B cells [CD45<sup>+</sup>CD19<sup>+</sup>] and T cells [CD45<sup>+</sup>CD3<sup>+</sup>]). (b) Representative flow cytometric plots and gating strategy in blood for neutrophils [CD11b<sup>+</sup>Ly6G<sup>+</sup>] and monocytes [CD11b<sup>+</sup>CD115<sup>+</sup>].

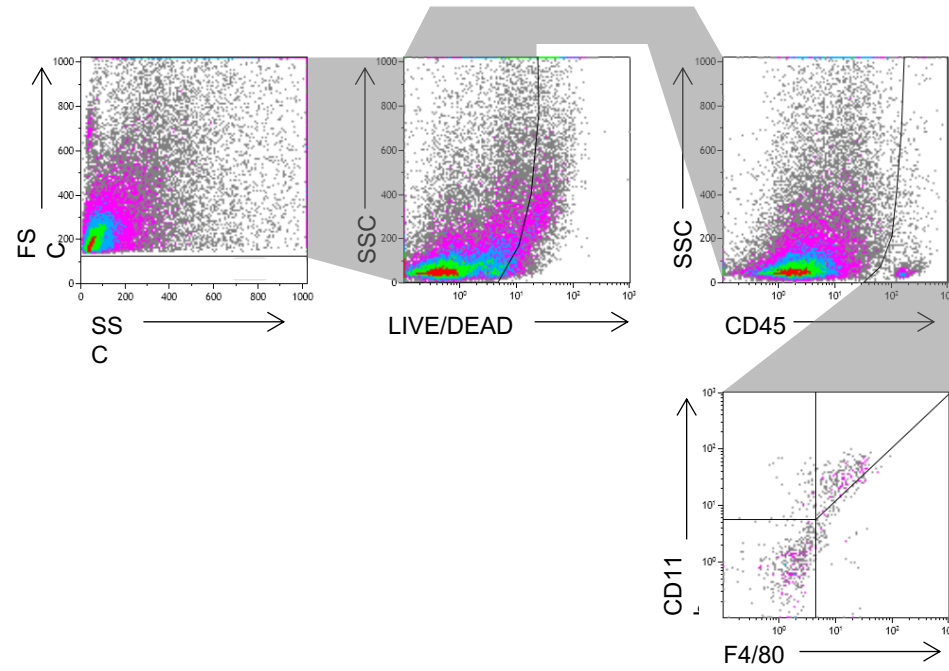

**ESM figure 5. Gating scheme of aortic macrophages.** Representative flow cytometric dot plots and gating strategy for leukocytes [CD45<sup>+</sup>] and macrophages [CD45<sup>+</sup>CD11b<sup>+</sup>F4/80<sup>+</sup>] in the aorta.

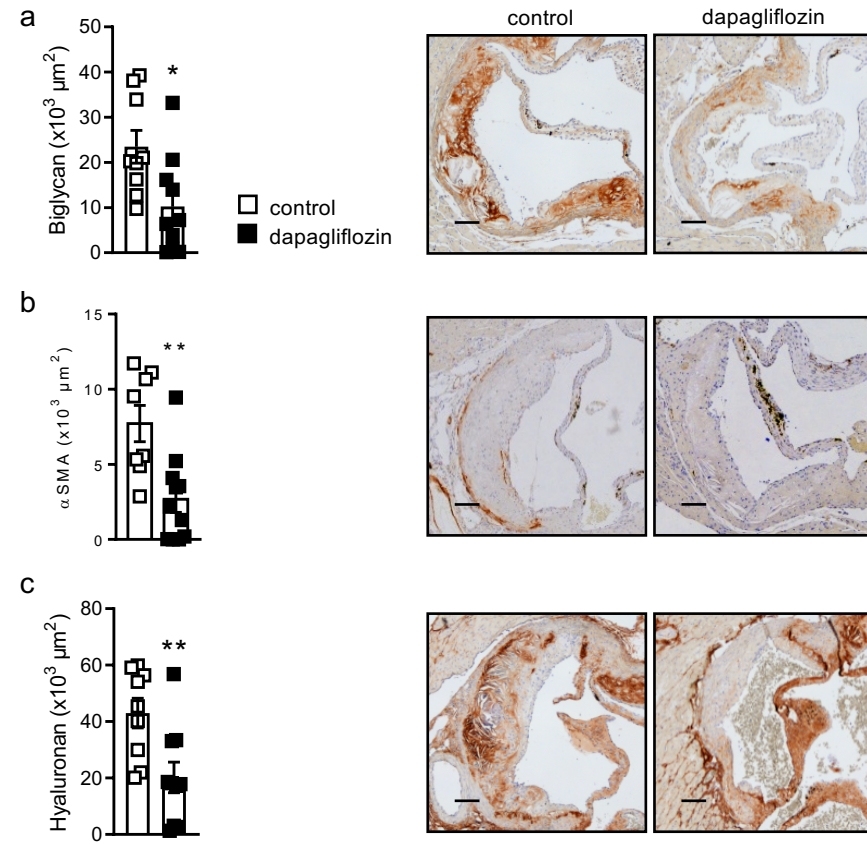

**ESM Fig. 6. Dapagliflozin alters plaque composition at the aortic root after 25 weeks of treatment.** Male, 8-week-old *Ldlr*<sup>-/-</sup> mice received diabetogenic diet (DD) supplemented either without (control) or with dapagliflozin (25 mg/kg DD) for 25 weeks. Immunohistochemical staining of (a) biglycan, (b) α-smooth muscle actin (αSMA) and (c) hyaluronan at the aortic root. Respective quantifications and representative pictures are shown; n= 9,12. Scale bars represent 100 μm. Data are presented as mean ± SEM; Two-tailed unpaired t-test; \**P*<0.05, \*\**P*<0.01.

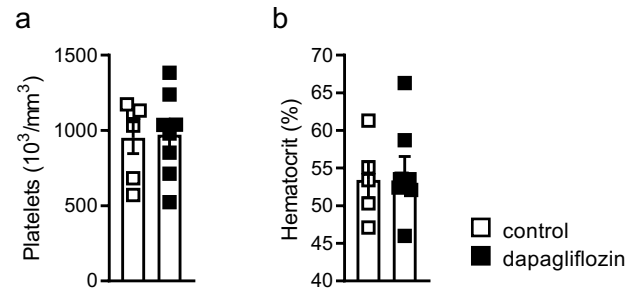

**ESM figure 7. Platelet count and hematocrit are not affected by 25 weeks of dapagliflozin treatment in *Ldlr*<sup>-/-</sup> mice.** (a) Platelet count and (b) hematocrit in *Ldlr*<sup>-/-</sup> mice treated for 25 weeks with diabetogenic diet (DD) supplemented with or without dapagliflozin (25 mg/kg DD); n=6-8. Data are presented as mean  $\pm$  SEM, Two-tailed unpaired t-test.

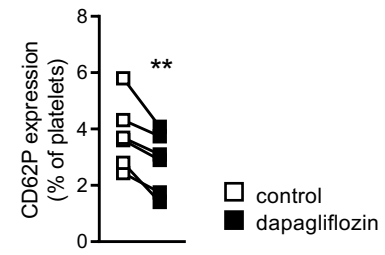

**ESM figure 8. Dapagliflozin inhibits CD62P expression in murine platelets *ex vivo*.** Platelet CD62P expression before (control) and after incubation of murine whole blood with dapagliflozin (0.5  $\mu$ M) for 30 min at 37 °C *ex vivo*; n=10. Data are presented as paired values; paired t-test; \*\* $P$ <0.01.

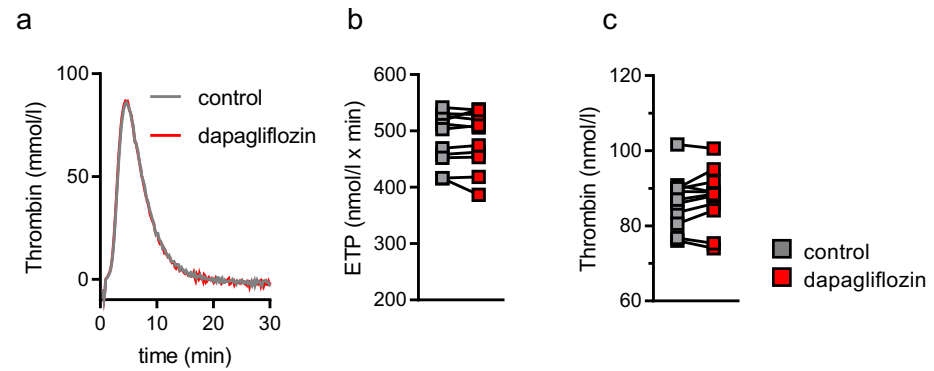

**ESM figure 9. Dapagliflozin does not influence thrombin generation in murine plasma *ex vivo*.** (a) Endogenous thrombin generation after *ex vivo* incubation of murine platelet poor plasma before (control) and after incubation with dapagliflozin 0.5  $\mu$ M for 30 min at 37  $^{\circ}$ C . (b), calculation of the respective area under the curve (endogenous thrombin potential; ETP), and (c) , peak height; n=11. Data are presented as paired values: paired t-test.
